# Supplementary material for: Degree of Glomerulosclerosis in Procurement Kidney Biopsies from Marginal Donor Kidneys and Their Implications in Predicting Graft Outcomes
Source: PubMed Central journal article supplement (PMC7291279; doi:10.3390/jcm9051469), 2020-05-14

**Table S1** Univariable and multivariable cox regression analyses for post-transplant outcomes between Glomerulosclerosis >20% vs. 11-20%

a) Death-censored graft survival

| Factors                                                 | Unadjusted           |         | Adjusted          |         |
|---------------------------------------------------------|----------------------|---------|-------------------|---------|
|                                                         | HR (95% CI)          | P-value | HR (95% CI)       | P-value |
| Glomerulosclerosis >20% vs. 11-20%                      | 0.95 (0.79, 1.14)    | 0.57    | 0.95 (0.78, 1.15) | 0.59    |
| Donor                                                   |                      |         |                   |         |
| Age                                                     | 1.01 (0.99, 1.02)    | 0.37    |                   |         |
| Male vs. female                                         | 1.02 (0.86, 1.20)    | 0.84    |                   |         |
| Black vs. others                                        | 1.41 (1.18, 1.68)    | <0.001  | 1.29 (1.07, 1.56) | 0.007   |
| Diabetes vs. others                                     | 1.07 (0.91, 1.26)    | 0.43    |                   |         |
| Hypertension vs. others                                 | 1.14 (0.91, 1.42)    | 0.25    |                   |         |
| BMI                                                     | 1.007 (0.997, 1.018) | 0.17    |                   |         |
| Log serum creatinine                                    | 1.24 (1.02, 1.51)    | 0.03    | 1.10 (0.89, 1.35) | 0.37    |
| DCD vs. others                                          | 0.81 (0.57, 1.16)    | 0.26    |                   |         |
| HCV antibody (+ vs. -)                                  | 1.44 (0.93, 2.23)    | 0.10    |                   |         |
| Cerebrovascular accident as a cause of death vs. others | 1.13 (0.91, 1.40)    | 0.28    |                   |         |
| Machine perfusion (yes vs. no)                          | 0.83 (0.71, 0.98)    | 0.03    | 0.85 (0.71, 1.01) | 0.06    |
| Recipient                                               |                      |         |                   |         |
| Age                                                     | 0.985 (0.976, 0.993) | <0.001  | 0.99 (0.78, 1.15) | 0.59    |
| Male vs. female                                         | 1.27 (1.06, 1.51)    | 0.008   | 1.32 (1.10, 1.58) | 0.003   |
| Black vs. others                                        | 1.55 (1.31, 1.82)    | <0.001  | 1.41 (1.18, 1.68) | <0.001  |
| BMI                                                     | 1.02 (1.00, 1.03)    | 0.03    | 1.01 (1.00, 1.03) | 0.18    |
| Diabetes vs. others                                     | 1.07 (0.91, 1.26)    | 0.43    |                   |         |
| Preemptive vs. others                                   | 0.48 (0.33, 0.69)    | <0.001  | 0.51 (0.34, 0.75) | 0.001   |
| PRA >60 vs. 0-60%                                       | 0.81 (0.53, 1.24)    | 0.33    |                   |         |
| Transplant                                              |                      |         |                   |         |
| HLA DR mismatch                                         |                      |         |                   |         |
| 0                                                       | 1.00                 |         |                   |         |
| 1                                                       | 0.84 (0.61, 1.16)    | 0.30    |                   |         |
| 2                                                       | 0.79 (0.58, 1.08)    | 0.14    |                   |         |
| Cold ischemic time                                      | 1.01 (1.00, 1.02)    | 0.004   | 1.01 (1.00, 1.02) | 0.01    |
| Transplant period                                       |                      |         |                   |         |
| 2011-2014                                               | 1.00                 |         |                   |         |
| 2008-2010                                               | 1.21 (0.98, 1.50)    | 0.08    |                   |         |
| 2005-2007                                               | 1.14 (0.92, 1.40)    | 0.22    |                   |         |
| Induction therapy                                       |                      |         |                   |         |
| Thymoglobulin                                           | 1.00                 |         | 1.00              |         |
| Alemtuzumab                                             | 1.39 (1.09, 1.76)    | 0.007   | 1.28 (1.00, 1.63) | 0.05    |
| Basiliximab                                             | 1.24 (0.98, 1.55)    | 0.07    | 1.30 (1.03, 1.64) | 0.03    |

|                 |                   |        |                   |       |
|-----------------|-------------------|--------|-------------------|-------|
| Other induction | 1.75 (1.30, 2.36) | <0.001 | 1.70 (1.25, 2.30) | 0.001 |
| No induction    | 0.91 (0.68, 1.21) | 0.51   | 0.86 (0.64, 1.15) | 0.32  |

CI, confidence interval; HR, hazard ratio; DCD, Donor after cardiac death; HCV, hepatitis C virus; BMI, body mass index; PRA, panel reactive antibody; HLA, human leukocyte antigen

b) All-cause mortality

| Factors                                                       | Unadjusted           |         | Adjusted          |         |
|---------------------------------------------------------------|----------------------|---------|-------------------|---------|
|                                                               | HR (95% CI)          | P-value | HR (95% CI)       | P-value |
| Glomerulosclerosis<br>>20% vs. 11-20%                         | 0.97 (0.83, 1.13)    | 0.66    | 1.00 (0.86, 1.17) | 0.98    |
| Donor                                                         |                      |         |                   |         |
| Age                                                           | 1.02 (1.01, 1.03)    | <0.001  | 1.01 (1.00, 1.02) | 0.24    |
| Male vs. female                                               | 1.00 (0.86, 1.15)    | 0.96    |                   |         |
| Black vs. others                                              | 1.06 (0.90, 1.24)    | 0.49    |                   |         |
| Diabetes vs. others                                           | 0.98 (0.84, 1.14)    | 0.76    |                   |         |
| Hypertension vs.<br>others                                    | 0.93 (0.78, 1.12)    | 0.44    |                   |         |
| BMI                                                           | 0.995 (0.985, 1.005) | 0.32    |                   |         |
| Log serum creatinine                                          | 0.96 (0.81, 1.14)    | 0.65    |                   |         |
| DCD vs. others                                                | 0.99 (0.74, 1.32)    | 0.94    |                   |         |
| HCV antibody (+ vs. -)                                        | 0.53 (0.29, 0.96)    | 0.04    | 0.81 (0.44, 1.48) | 0.49    |
| Cerebrovascular<br>accident as a cause of<br>death vs. others | 1.13 (0.94, 1.37)    | 0.20    |                   |         |
| Machine perfusion<br>(yes vs. no)                             | 0.91 (0.79, 1.05)    | 0.19    |                   |         |
| Recipient                                                     |                      |         |                   |         |
| Age                                                           | 1.04 (1.03, 1.05)    | <0.001  | 1.04 (1.03, 1.05) | <0.001  |
| Male vs. female                                               | 1.14 (0.98, 1.33)    | 0.08    |                   |         |
| Black vs. others                                              | 0.92 (0.80, 1.07)    | 0.29    |                   |         |
| BMI                                                           | 0.999 (0.986, 1.012) | 0.87    |                   |         |
| Diabetes vs. others                                           | 1.52 (1.31, 1.75)    | <0.001  | 1.45 (1.26, 1.68) | <0.001  |
| Preemptive vs. others                                         | 0.60 (0.45, 0.80)    | <0.001  |                   |         |
| PRA >60 vs. 0-60%                                             | 0.75 (0.52, 1.09)    | 0.13    |                   |         |
| Transplant                                                    |                      |         |                   |         |
| HLA DR mismatch                                               |                      |         |                   |         |
| 0                                                             | 1.00                 |         |                   |         |
| 1                                                             | 0.91 (0.68, 1.21)    | 0.51    |                   |         |
| 2                                                             | 0.89 (0.68, 1.18)    | 0.44    |                   |         |
| Cold ischemic time                                            | 1.001 (0.993, 1.009) | 0.81    |                   |         |
| Transplant period                                             |                      |         |                   |         |
| 2011-2014                                                     | 1.00                 |         |                   |         |
| 2008-2010                                                     | 1.09 (0.90, 1.33)    | 0.37    |                   |         |
| 2005-2007                                                     | 1.17 (0.97, 1.41)    | 0.10    |                   |         |
| Induction therapy                                             |                      |         |                   |         |
| Thymoglobulin                                                 | 1.00                 |         | 1.00              |         |
| Alemtuzumab                                                   | 1.21 (0.97, 1.50)    | 0.09    | 1.39 (1.12, 1.74) | 0.003   |
| Basiliximab                                                   | 1.50 (1.24, 1.82)    | <0.001  | 1.44 (1.18, 1.74) | <0.001  |
| Other induction                                               | 1.76 (1.35, 2.28)    | <0.001  | 1.70 (1.31, 2.20) | <0.001  |
| No induction                                                  | 1.10 (0.88, 1.38)    | 0.42    | 1.14 (0.91, 1.42) | 0.27    |

CI, confidence interval; HR, hazard ratio; DCD, Donor after cardiac death; HCV, hepatitis C virus; BMI, body mass index; PRA, panel reactive antibody; HLA, human leukocyte antigen

c) 1-year acute rejection

| Factors                                                 | Unadjusted           |         | Adjusted             |         |
|---------------------------------------------------------|----------------------|---------|----------------------|---------|
|                                                         | OR (95% CI)          | P-value | OR (95% CI)          | P-value |
| Glomerulosclerosis >20% vs. 11-20%                      | 1.13 (0.85, 1.50)    | 0.41    | 1.10 (0.81, 1.48)    | 0.54    |
| Donor                                                   |                      |         |                      |         |
| Age                                                     | 0.993 (0.986, 1.000) | 0.06    |                      |         |
| Male vs. female                                         | 0.81 (0.72, 0.90)    | <0.001  | 0.69 (0.52, 0.92)    | 0.01    |
| Black vs. others                                        | 1.19 (1.06, 1.33)    | 0.003   | 1.28 (0.95, 1.73)    | 0.10    |
| Diabetes vs. others                                     | 0.98 (0.87, 1.10)    | 0.68    |                      |         |
| Hypertension vs. others                                 | 1.00 (0.88, 1.14)    | 0.99    |                      |         |
| BMI                                                     | 1.008 (1.001, 1.016) | 0.02    | 1.015 (0.997, 1.032) | 0.10    |
| Log serum creatinine                                    | 1.06 (0.94, 1.20)    | 0.32    |                      |         |
| DCD vs. others                                          | 0.97 (0.81, 1.17)    | 0.79    |                      |         |
| HCV antibody (+ vs. -)                                  | 1.34 (1.09, 1.63)    | 0.005   | 2.20 (1.09, 4.44)    | 0.03    |
| Cerebrovascular accident as a cause of death vs. others | 1.15 (1.01, 1.31)    | 0.04    | 1.61 (1.09, 2.40)    | 0.02    |
| Machine perfusion (yes vs. no)                          | 1.01 (0.91, 1.13)    | 0.80    |                      |         |
| Recipient                                               |                      |         |                      |         |
| Age                                                     | 0.982 (0.976, 0.986) | <0.001  | 0.988 (0.974, 1.002) | 0.08    |
| Male vs. female                                         | 1.16 (1.03, 1.29)    | 0.01    | 1.55 (1.15, 2.09)    | 0.004   |
| Black vs. others                                        | 1.12 (1.01, 1.25)    | 0.04    | 1.02 (0.76, 1.36)    | 0.89    |
| BMI                                                     | 0.997 (0.988, 1.007) | 0.60    |                      |         |
| Diabetes vs. others                                     | 0.88 (0.79, 0.97)    | 0.01    | 0.70 (0.53, 0.93)    | 0.01    |
| Preemptive vs. others                                   | 0.89 (0.75, 1.06)    | 0.20    |                      |         |
| PRA >60 vs. 0-60%                                       | 1.14 (0.94, 1.38)    | 0.19    |                      |         |
| Transplant                                              |                      |         |                      |         |
| HLA DR mismatch                                         |                      |         |                      |         |
| 0                                                       | 1.00                 |         | 1.00                 |         |
| 1                                                       | 1.17 (0.95, 1.43)    | 0.13    | 1.64 (0.83, 3.22)    | 0.15    |
| 2                                                       | 1.33 (1.09, 1.63)    | 0.004   | 2.30 (1.20, 4.42)    | 0.01    |
| Cold ischemic time                                      | 1.006 (1.000, 1.011) | 0.05    |                      |         |
| Transplant period                                       |                      |         |                      |         |
| 2011-2014                                               | 1.00                 |         | 1.00                 |         |
| 2008-2010                                               | 1.05 (0.92, 1.20)    | 0.44    | 1.05 (0.75, 1.46)    | 0.79    |
| 2005-2007                                               | 1.40 (1.23, 1.59)    | <0.001  | 1.52 (1.08, 2.14)    | 0.02    |
| Induction therapy                                       |                      |         |                      |         |
| Thymoglobulin                                           | 1.00                 |         | 1.00                 |         |
| Alemtuzumab                                             | 1.03 (0.88, 1.22)    | 0.69    | 1.30 (0.86, 1.95)    | 0.21    |
| Basiliximab                                             | 1.52 (1.32, 1.75)    | <0.001  | 1.68 (1.18, 2.41)    | 0.004   |
| Other induction                                         | 0.96 (0.77, 1.19)    | 0.70    | 1.51 (0.90, 2.55)    | 0.12    |
| No induction                                            | 1.14 (0.98, 1.33)    | 0.10    | 1.24 (0.81, 1.92)    | 0.32    |

CI, confidence interval; HR, hazard ratio; DCD, Donor after cardiac death; HCV, hepatitis C virus; BMI, body mass index; PRA, panel reactive antibody; HLA, human leukocyte antigen

d) Delayed graft function

| Factors                                                 | Unadjusted           |         | Adjusted             |         |
|---------------------------------------------------------|----------------------|---------|----------------------|---------|
|                                                         | OR (95% CI)          | P-value | OR (95% CI)          | P-value |
| Glomerulosclerosis >20% vs. 11-20%                      | 0.86 (0.69, 1.07)    | 0.17    | 0.82 (0.65, 1.05)    | 0.11    |
| Donor                                                   |                      |         |                      |         |
| Age                                                     | 0.981 (0.975, 0.986) | <0.001  | 0.999 (0.981, 1.017) | 0.87    |
| Male vs. female                                         | 1.30 (1.20, 1.41)    | <0.001  | 1.46 (1.16, 1.85)    | 0.001   |
| Black vs. others                                        | 1.04 (0.96, 1.14)    | 0.34    |                      |         |
| Diabetes vs. others                                     | 1.04 (0.95, 1.13)    | 0.38    |                      |         |
| Hypertension vs. others                                 | 1.16 (1.05, 1.28)    | 0.003   | 0.82 (0.61, 1.10)    | 0.19    |
| BMI                                                     | 1.023 (1.017, 1.029) | <0.001  | 1.020 (1.005, 1.036) | 0.008   |
| Log serum creatinine                                    | 1.71 (1.56, 1.88)    | <0.001  | 1.45 (1.08, 1.94)    | 0.02    |
| DCD vs. others                                          | 2.36 (2.07, 2.69)    | <0.001  | 3.95 (2.53, 6.18)    | <0.001  |
| HCV antibody (+ vs. -)                                  | 1.08 (0.92, 1.27)    | 0.36    |                      |         |
| Cerebrovascular accident as a cause of death vs. others | 0.87 (0.79, 0.95)    | 0.003   | 0.96 (0.73, 1.25)    | 0.74    |
| Machine perfusion (yes vs. no)                          | 0.73 (0.68, 0.79)    | <0.001  | 0.50 (0.40, 0.62)    | <0.001  |
| Recipient                                               |                      |         |                      |         |
| Age                                                     | 0.992 (0.988, 0.996) | <0.001  | 0.995 (0.984, 1.007) | 0.43    |
| Male vs. female                                         | 1.36 (1.26, 1.48)    | <0.001  | 1.58 (1.26, 1.98)    | <0.001  |
| Black vs. others                                        | 1.55 (1.43, 1.68)    | <0.001  | 1.44 (1.15, 1.81)    | 0.001   |
| BMI                                                     | 1.027 (1.020, 1.034) | <0.001  | 1.020 (1.005, 1.036) | 0.008   |
| Diabetes vs. others                                     | 1.38 (1.27, 1.49)    | <0.001  | 1.23 (0.99, 1.53)    | 0.06    |
| Preemptive vs. others                                   | 0.27 (0.22, 0.32)    | <0.001  | 0.16 (0.09, 0.28)    | <0.001  |
| PRA >60 vs. 0-60%                                       | 1.04 (0.90, 1.21)    | 0.59    |                      |         |
| Transplant                                              |                      |         |                      |         |
| HLA DR mismatch                                         |                      |         |                      |         |
| 0                                                       | 1.00                 |         |                      |         |
| 1                                                       | 1.01 (0.88, 1.17)    | 0.87    |                      |         |
| 2                                                       | 1.05 (0.91, 1.20)    | 0.53    |                      |         |
| Cold ischemic time                                      | 1.013 (1.009, 1.017) | <0.001  | 1.014 (1.003, 1.026) | 0.02    |
| Transplant period                                       |                      |         |                      |         |
| 2011-2014                                               | 1.00                 |         |                      |         |
| 2008-2010                                               | 0.95 (0.86, 1.05)    | 0.32    |                      |         |
| 2005-2007                                               | 1.03 (0.93, 1.13)    | 0.59    |                      |         |
| Induction therapy                                       |                      |         |                      |         |
| Thymoglobulin                                           | 1.00                 |         | 1.00                 |         |
| Alemtuzumab                                             | 0.81 (0.71, 0.91)    | 0.001   | 0.87 (0.63, 1.21)    | 0.41    |
| Basiliximab                                             | 0.99 (0.89, 1.10)    | 0.80    | 1.22 (0.91, 1.62)    | 0.18    |
| Other induction                                         | 1.51 (1.30, 1.74)    | <0.001  | 1.92 (1.27, 2.90)    | 0.002   |
| No induction                                            | 0.96 (0.85, 1.07)    | 0.44    | 1.25 (0.88, 1.77)    | 0.22    |

CI, confidence interval; HR, hazard ratio; DCD, Donor after cardiac death; HCV, hepatitis C virus; BMI, body mass index; PRA, panel reactive antibody; HLA, human leukocyte antigen



**Table S2.** Univariable and multivariable cox regression analyses for post-transplant outcomes between Glomerulosclerosis >10% vs. 0-10%

a) Death-censored graft survival

| Factors                                                 | Unadjusted           |         | Adjusted             |         |
|---------------------------------------------------------|----------------------|---------|----------------------|---------|
|                                                         | HR (95% CI)          | P-value | HR (95% CI)          | P-value |
| Glomerulosclerosis >10% vs. 0-10%                       | 1.24 (1.13, 1.36)    | <0.001  | 1.27 (1.15, 1.40)    | <0.001  |
| Donor                                                   |                      |         |                      |         |
| Age                                                     | 0.997 (0.991, 1.002) | 0.22    | -                    |         |
| Male vs. female                                         | 1.00 (0.93, 1.08)    | 0.95    | -                    |         |
| Black vs. others                                        | 1.25 (1.15, 1.35)    | <0.001  | 1.12 (1.02, 1.22)    | 0.01    |
| Diabetes vs. others                                     | 1.18 (1.09, 1.28)    | <0.001  | 1.16 (1.06, 1.27)    | 0.001   |
| Hypertension vs. others                                 | 1.09 (0.99, 1.20)    | 0.07    | -                    |         |
| BMI                                                     | 1.007 (1.002, 1.012) | 0.01    | 1.002 (0.997, 1.008) | 0.43    |
| Log serum creatinine                                    | 1.22 (1.12, 1.33)    | <0.001  | 1.17 (1.06, 1.28)    | 0.001   |
| DCD vs. others                                          | 0.95 (0.83, 1.09)    | 0.49    | -                    |         |
| HCV antibody (+ vs. -)                                  | 1.54 (1.34, 1.78)    | <0.001  | 1.31 (1.12, 1.53)    | 0.001   |
| Cerebrovascular accident as a cause of death vs. others | 1.03 (0.94, 1.13)    | 0.55    | -                    |         |
| Machine perfusion (yes vs. no)                          | 0.95 (0.88, 1.02)    | 0.19    | -                    |         |
| Recipient                                               |                      |         |                      |         |
| Age                                                     | 0.985 (0.982, 0.989) | <0.001  | 0.991 (0.988, 0.995) | <0.001  |
| Male vs. female                                         | 1.18 (1.09, 1.27)    | <0.001  | 1.16 (1.07, 1.26)    | <0.001  |
| Black vs. others                                        | 1.53 (1.42, 1.65)    | <0.001  | 1.35 (1.25, 1.47)    | <0.001  |
| BMI                                                     | 1.02 (1.01, 1.03)    | <0.001  | 1.02 (1.01, 1.03)    | <0.001  |
| Diabetes vs. others                                     | 1.20 (1.11, 1.29)    | <0.001  | 1.16 (1.07, 1.25)    | <0.001  |
| Preemptive vs. others                                   | 0.67 (0.58, 0.77)    | <0.001  | 0.72 (0.62, 0.83)    | <0.001  |
| PRA >60 vs. 0-60%                                       | 1.04 (0.89, 1.22)    | 0.63    | -                    |         |
| Transplant                                              |                      |         |                      |         |
| HLA DR mismatch                                         |                      |         |                      |         |
| 0                                                       | 1.00                 |         | -                    |         |
| 1                                                       | 1.12 (0.96, 1.29)    | 0.15    |                      |         |
| 2                                                       | 1.10 (0.95, 1.27)    | 0.22    |                      |         |
| Cold ischemic time                                      | 1.007 (1.003, 1.011) | <0.001  | 1.005 (1.001, 1.009) | 0.01    |
| Transplant period                                       |                      |         |                      |         |
| 2011-2014                                               | 1.00                 |         | 1.00                 |         |
| 2008-2010                                               | 1.27 (1.15, 1.40)    | <0.001  | 1.25 (1.13, 1.38)    | <0.001  |
| 2005-2007                                               | 1.37 (1.23, 1.51)    | <0.001  | 1.40 (1.26, 1.56)    | <0.001  |
| Induction therapy                                       |                      |         |                      |         |
| Thymoglobulin                                           | 1.00                 |         | 1.00                 |         |
| Alemtuzumab                                             | 1.22 (1.09, 1.36)    | <0.001  | 1.22 (1.09, 1.37)    | 0.001   |
| Basiliximab                                             | 1.02 (0.91, 1.14)    | 0.76    | 1.06 (0.95, 1.19)    | 0.29    |

|                 |                   |        |                   |        |
|-----------------|-------------------|--------|-------------------|--------|
| Other induction | 1.54 (1.35, 1.76) | <0.001 | 1.46 (1.27, 1.68) | <0.001 |
| No induction    | 1.08 (0.96, 1.20) | 0.19   | 1.05 (0.93, 1.17) | 0.43   |

CI, confidence interval; HR, hazard ratio; DCD, Donor after cardiac death; HCV, hepatitis C virus; BMI, body mass index; PRA, panel reactive antibody; HLA, human leukocyte antigen

b) All-cause mortality

| Factors                                                       | Unadjusted           |         | Adjusted             |         |
|---------------------------------------------------------------|----------------------|---------|----------------------|---------|
|                                                               | HR (95% CI)          | P-value | HR (95% CI)          | P-value |
| Glomerulosclerosis<br>>10% vs. 0-10%                          | 1.07 (0.99, 1.16)    | 0.10    | 1.03 (0.96, 1.12)    | 0.40    |
| Donor                                                         |                      |         |                      |         |
| Age                                                           | 1.018 (1.014, 1.023) | <0.001  | -                    |         |
| Male vs. female                                               | 1.01 (0.95, 1.07)    | 0.83    | -                    |         |
| Black vs. others                                              | 0.89 (0.83, 0.96)    | 0.001   | 1.02 (0.96, 1.10)    | 0.51    |
| Diabetes vs. others                                           | 1.02 (0.95, 1.09)    | 0.63    | -                    |         |
| Hypertension vs.<br>others                                    | 0.98 (0.91, 1.06)    | 0.60    | -                    |         |
| BMI                                                           | 0.999 (0.995, 1.004) | 0.68    | -                    |         |
| Log serum creatinine                                          | 0.99 (0.92, 1.07)    | 0.85    | -                    |         |
| DCD vs. others                                                | 0.94 (0.84, 1.05)    | 0.28    | -                    |         |
| HCV antibody (+ vs. -)                                        | 1.06 (0.92, 1.21)    | 0.41    | -                    |         |
| Cerebrovascular<br>accident as a cause of<br>death vs. others | 1.01 (0.94, 1.09)    | 0.78    | -                    |         |
| Machine perfusion<br>(yes vs. no)                             | 0.95 (0.89, 1.01)    | 0.09    | -                    |         |
| Recipient                                                     |                      |         |                      |         |
| Age                                                           | 1.04 (1.03, 1.05)    | <0.001  | 1.044 (1.040, 1.048) | 0.40    |
| Male vs. female                                               | 1.21 (1.13, 1.29)    | <0.001  | 1.13 (1.06, 1.21)    | <0.001  |
| Black vs. others                                              | 0.87 (0.82, 0.93)    | <0.001  | 1.00 (0.93, 1.06)    | 0.89    |
| BMI                                                           | 1.005 (1.000, 1.011) | 0.07    | -                    |         |
| Diabetes vs. others                                           | 1.51 (1.42, 1.61)    | <0.001  | 1.49 (1.40, 1.58)    | <0.001  |
| Preemptive vs. others                                         | 0.68 (0.60, 0.76)    | <0.001  | 0.65 (0.58, 0.73)    | <0.001  |
| PRA >60 vs. 0-60%                                             | 0.92 (0.80, 1.05)    | 0.21    | -                    |         |
| Transplant                                                    |                      |         |                      |         |
| HLA DR mismatch                                               |                      |         |                      |         |
| 0                                                             | 1.00                 |         | -                    |         |
| 1                                                             | 1.06 (0.94, 1.19)    | 0.38    |                      |         |
| 2                                                             | 1.06 (0.94, 1.19)    | 0.37    |                      |         |
| Cold ischemic time                                            | 1.000 (0.996, 1.003) | 0.80    | -                    |         |
| Transplant period                                             |                      |         |                      |         |
| 2011-2014                                                     | 1.00                 |         | 1.00                 |         |
| 2008-2010                                                     | 1.12 (1.02, 1.22)    | 0.01    | 1.17 (1.07, 1.27)    | <0.001  |
| 2005-2007                                                     | 1.09 (1.00, 1.19)    | 0.04    | 1.27 (1.16, 1.39)    | <0.001  |
| Induction therapy                                             |                      |         |                      |         |
| Thymoglobulin                                                 | 1.00                 |         | 1.00                 |         |
| Alemtuzumab                                                   | 0.98 (0.89, 1.08)    | 0.64    | 1.08 (0.97, 1.19)    | 0.15    |
| Basiliximab                                                   | 1.26 (1.16, 1.37)    | <0.001  | 1.21 (1.12, 1.32)    | <0.001  |
| Other induction                                               | 1.27 (1.13, 1.42)    | <0.001  | 1.26 (1.12, 1.42)    | <0.001  |
| No induction                                                  | 0.99 (0.90, 1.08)    | 0.81    | 0.99 (0.90, 1.08)    | 0.80    |

CI, confidence interval; HR, hazard ratio; DCD, Donor after cardiac death; HCV, hepatitis C virus; BMI, body mass index; PRA, panel reactive antibody; HLA, human leukocyte antigen

c) 1-year rejection

| Factors                                                 | Unadjusted           |         | Adjusted             |         |
|---------------------------------------------------------|----------------------|---------|----------------------|---------|
|                                                         | OR (95% CI)          | P-value | OR (95% CI)          | P-value |
| Glomerulosclerosis >10% vs. 0-10%                       | 1.10 (0.95, 1.28)    | 0.19    | 1.13 (0.97, 1.31)    | 0.11    |
| Donor                                                   |                      |         |                      |         |
| Age                                                     | 0.993 (0.986, 1.000) | 0.06    | -                    |         |
| Male vs. female                                         | 0.81 (0.72, 0.90)    | <0.001  | 0.81 (0.69, 0.95)    | 0.009   |
| Black vs. others                                        | 1.19 (1.06, 1.33)    | 0.003   | 1.14 (0.99, 1.30)    | 0.06    |
| Diabetes vs. others                                     | 0.98 (0.87, 1.10)    | 0.68    | -                    |         |
| Hypertension vs. others                                 | 1.001 (0.879, 1.139) | 0.99    | -                    |         |
| BMI                                                     | 1.008 (1.001, 1.016) | 0.02    | 1.008 (0.999, 1.016) | 0.07    |
| Log serum creatinine                                    | 1.06 (0.94, 1.20)    | 0.32    | -                    |         |
| DCD vs. others                                          | 0.97 (0.81, 1.17)    | 0.79    | -                    |         |
| HCV antibody (+ vs. -)                                  | 1.34 (1.09, 1.63)    | 0.005   | 1.32 (1.03, 1.69)    | 0.03    |
| Cerebrovascular accident as a cause of death vs. others | 1.15 (1.01, 1.31)    | 0.04    | 1.04 (0.90, 1.21)    | 0.57    |
| Machine perfusion (yes vs. no)                          | 1.01 (0.91, 1.13)    | 0.80    | -                    |         |
| Recipient                                               |                      |         |                      |         |
| Age                                                     | 0.982 (0.976, 0.986) | <0.001  | 0.985 (0.979, 0.991) | <0.001  |
| Male vs. female                                         | 1.16 (1.03, 1.29)    | 0.01    | 1.19 (1.05, 1.36)    | 0.007   |
| Black vs. others                                        | 1.12 (1.01, 1.25)    | 0.04    | 1.02 (0.90, 1.16)    | 0.74    |
| BMI                                                     | 0.997 (0.987, 1.007) | 0.60    | -                    |         |
| Diabetes vs. others                                     | 0.88 (0.79, 0.97)    | 0.01    | 0.92 (0.82, 1.04)    | 0.20    |
| Preemptive vs. others                                   | 0.89 (0.75, 1.06)    | 0.20    | -                    |         |
| PRA >60 vs. 0-60%                                       | 1.14 (0.94, 1.38)    | 0.19    | -                    |         |
| Transplant                                              |                      |         |                      |         |
| HLA DR mismatch                                         |                      |         |                      |         |
| 0                                                       | 1.00                 |         | 1.00                 |         |
| 1                                                       | 1.17 (0.96, 1.43)    | 0.13    | 1.25 (0.97, 1.62)    | 0.08    |
| 2                                                       | 1.33 (1.09, 1.63)    | 0.004   | 1.49 (1.17, 1.91)    | 0.001   |
| Cold ischemic time                                      | 1.006 (1.001, 1.011) | 0.04    | 1.003 (0.997, 1.009) | 0.35    |
| Transplant period                                       |                      |         |                      |         |
| 2011-2014                                               | 1.00                 |         | 1.00                 |         |
| 2008-2010                                               | 1.05 (0.92, 1.20)    | 0.44    | 1.02 (0.88, 1.18)    | 0.82    |
| 2005-2007                                               | 1.40 (1.23, 1.59)    | <0.001  | 1.45 (1.25, 1.68)    | <0.001  |
| Induction therapy                                       |                      |         |                      |         |
| Thymoglobulin                                           | 1.00                 |         | 1.00                 |         |
| Alemtuzumab                                             | 1.03 (0.88, 1.22)    | 0.69    | 1.02 (0.85, 1.23)    | 0.84    |
| Basiliximab                                             | 1.52 (1.33, 1.75)    | <0.001  | 1.74 (1.49, 2.03)    | <0.001  |
| Other induction                                         | 0.96 (0.77, 1.19)    | 0.70    | 0.96 (0.75, 1.22)    | 0.74    |
| No induction                                            | 1.14 (0.98, 1.33)    | 0.10    | 1.10 (0.92, 1.32)    | 0.30    |

CI, confidence interval; HR, hazard ratio; DCD, Donor after cardiac death; HCV, hepatitis C virus; BMI, body mass index; PRA, panel reactive antibody; HLA, human leukocyte antigen

d) Delayed graft function

| Factors                                                 | Unadjusted           |         | Adjusted             |         |
|---------------------------------------------------------|----------------------|---------|----------------------|---------|
|                                                         | OR (95% CI)          | P-value | OR (95% CI)          | P-value |
| Glomerulosclerosis >10% vs. 0-10%                       | 1.10 (0.99, 1.23)    | 0.07    | 1.10 (0.98, 1.23)    | 0.11    |
| Donor                                                   |                      |         |                      |         |
| Age                                                     | 0.981 (0.976, 0.987) | <0.001  | -                    |         |
| Male vs. female                                         | 1.30 (1.20, 1.41)    | <0.001  | 1.17 (1.04, 1.32)    | 0.01    |
| Black vs. others                                        | 1.04 (0.96, 1.14)    | 0.34    | -                    |         |
| Diabetes vs. others                                     | 1.04 (0.95, 1.13)    | 0.38    | -                    |         |
| Hypertension vs. others                                 | 1.16 (1.05, 1.28)    | 0.003   | 0.99 (0.89, 1.11)    | 0.91    |
| BMI                                                     | 1.023 (1.017, 1.028) | <0.001  | 1.020 (1.014, 1.027) | <0.001  |
| Log serum creatinine                                    | 1.71 (1.56, 1.88)    | <0.001  | 1.52 (1.36, 1.71)    | <0.001  |
| DCD vs. others                                          | 2.36 (2.07, 2.69)    | <0.001  | -                    |         |
| HCV antibody (+ vs. -)                                  | 1.08 (0.92, 1.27)    | 0.36    | -                    |         |
| Cerebrovascular accident as a cause of death vs. others | 0.87 (0.79, 0.95)    | 0.003   | 0.90 (0.80, 1.00)    | 0.05    |
| Machine perfusion (yes vs. no)                          | 0.73 (0.68, 0.79)    | <0.001  | -                    |         |
| Recipient                                               |                      |         |                      |         |
| Age                                                     | 0.992 (0.988, 0.996) | <0.001  | 0.998 (0.994, 1.003) | 0.51    |
| Male vs. female                                         | 1.36 (1.26, 1.48)    | <0.001  | 1.35 (1.22, 1.48)    | <0.001  |
| Black vs. others                                        | 1.54 (1.43, 1.68)    | <0.001  | 1.46 (1.33, 1.61)    | <0.001  |
| BMI                                                     | 1.027 (1.020, 1.034) | <0.001  | 1.022 (1.014, 1.032) | <0.001  |
| Diabetes vs. others                                     | 1.38 (1.27, 1.49)    | <0.001  | 1.30 (1.19, 1.43)    | <0.001  |
| Preemptive vs. others                                   | 0.27 (0.22, 0.31)    | <0.001  | 0.23 (0.18, 0.28)    | <0.001  |
| PRA >60 vs. 0-60%                                       | 1.04 (0.90, 1.21)    | 0.59    | -                    |         |
| Transplant                                              |                      |         |                      |         |
| HLA DR mismatch                                         |                      |         |                      |         |
| 0                                                       | 1.00                 |         | -                    |         |
| 1                                                       | 1.01 (0.88, 1.17)    | 0.87    |                      |         |
| 2                                                       | 1.05 (0.91, 1.20)    | 0.53    |                      |         |
| Cold ischemic time                                      | 1.013 (1.009, 1.017) | <0.001  | 1.012 (1.007, 1.017) | <0.001  |
| Transplant period                                       |                      |         |                      |         |
| 2011-2014                                               | 1.00                 |         |                      |         |
| 2008-2010                                               | 1.03 (0.93, 1.13)    | 0.59    | -                    |         |
| 2005-2007                                               | 0.95 (0.86, 1.05)    | 0.32    |                      |         |
| Induction therapy                                       |                      |         |                      |         |
| Thymoglobulin                                           | 1.00                 |         | 1.00                 |         |
| Alemtuzumab                                             | 0.81 (0.71, 0.91)    | 0.001   | 0.75 (0.65, 0.86)    | <0.001  |
| Basiliximab                                             | 0.99 (0.89, 1.10)    | 0.80    | 0.95 (0.84, 1.08)    | 0.44    |
| Other induction                                         | 1.51 (1.30, 1.74)    | <0.001  | 1.41 (0.83, 1.08)    | <0.001  |
| No induction                                            | 0.96 (0.85, 1.07)    | 0.44    | 0.95 (0.83, 1.08)    | 0.42    |

CI, confidence interval; HR, hazard ratio; DCD, Donor after cardiac death; HCV, hepatitis C virus; BMI, body mass index; PRA, panel reactive antibody; HLA, human leukocyte antigen

**Figure S1** Procurement cohort

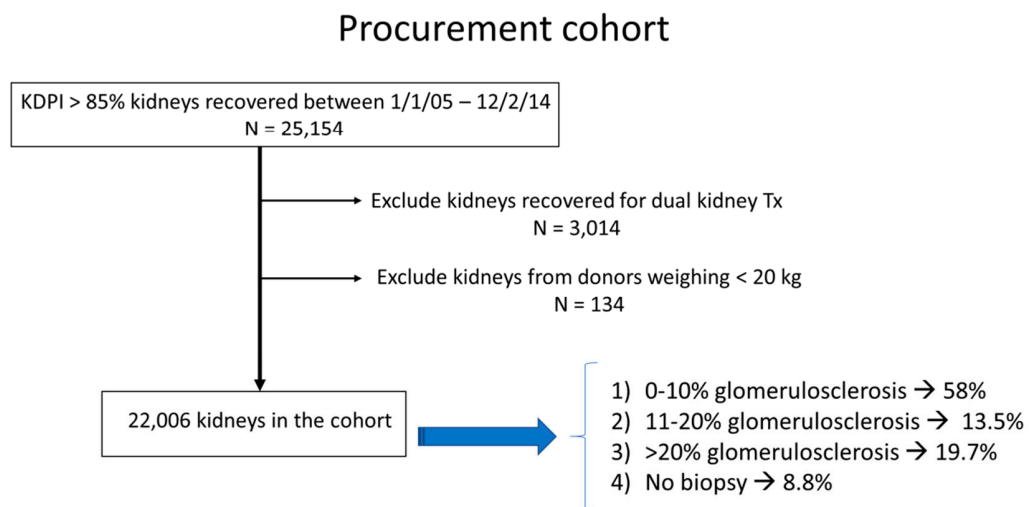



**Figure S2** Kidney transplant recipient cohort

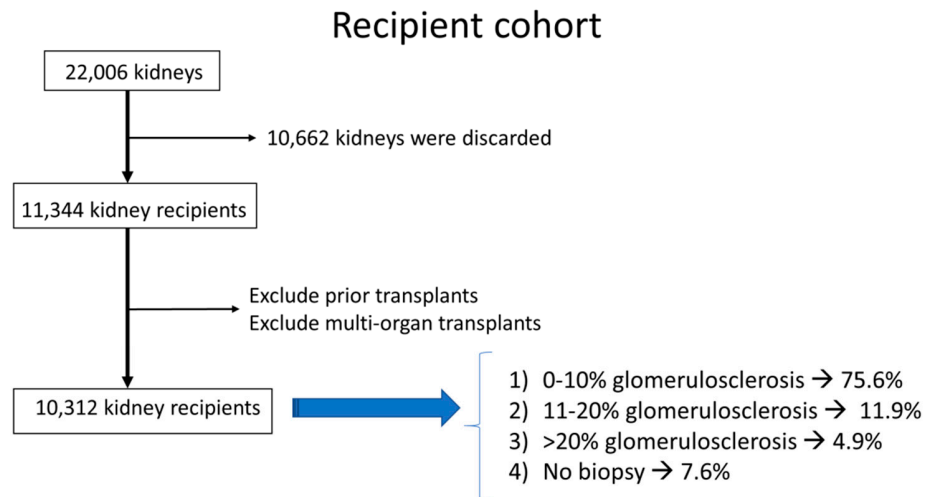

Supplement: jcm-09-01469-s001.pdf [file jcm-09-01469-s001.pdf]
